# Supplementary material
Source: PubMed Central journal article supplement (PMC7269813)
Supplement: NIHMS1551449-supplement-1.pdf [file NIHMS1551449-supplement-1.pdf]

**A** Primary Tumor Samples (n>50)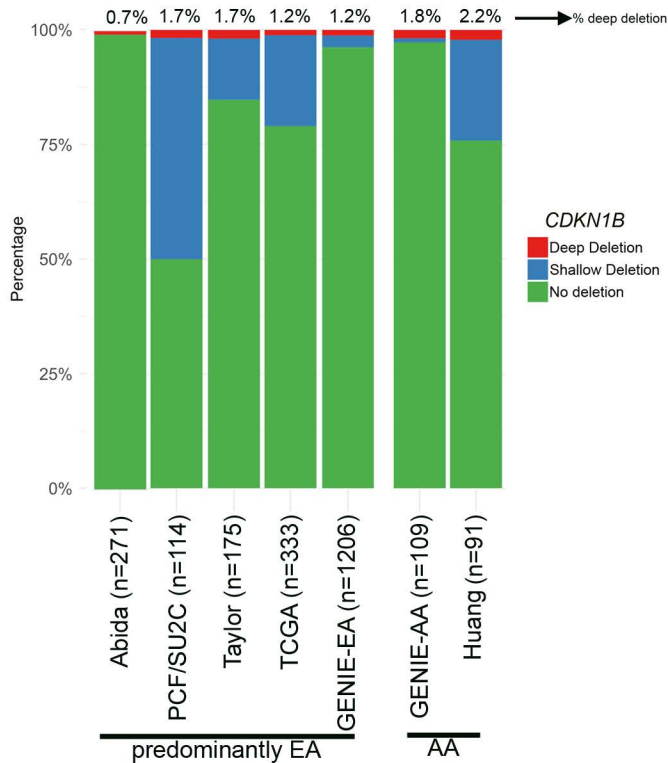**B** Metastatic Tumor Samples (n>50)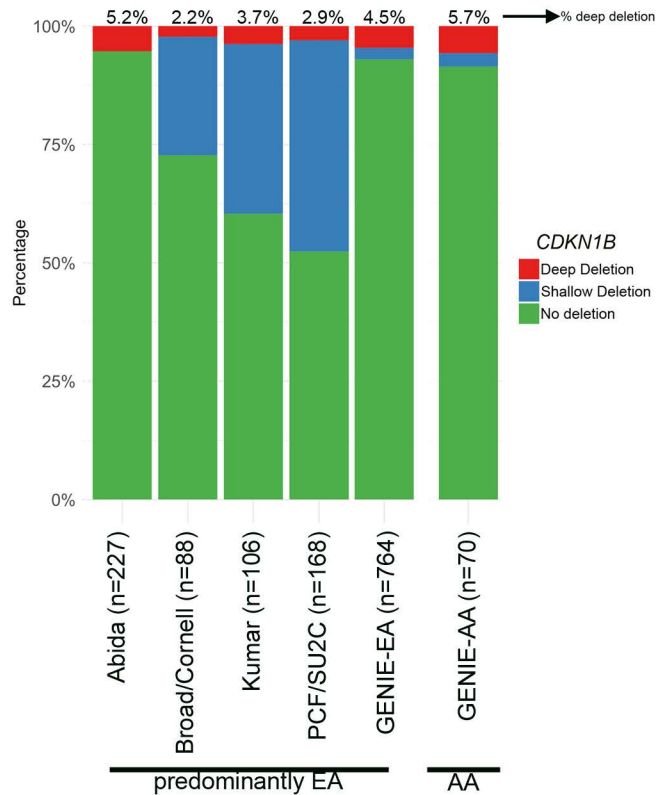

## Supplementary Figure Legends:

**Supplementary Figure S1: (A)** Frequency of shallow and deep deletions of *CDKN1B* among publicly available primary prostate cancer cohorts with sequencing data available on more than 50 patients, including Abida (1), PCF/SU2C (2,3), Taylor (4), TCGA (5), and GENIE (6). **(B)** Frequency of shallow and deep deletions of *CDKN1B* among publicly available metastatic prostate cancer cohorts with sequencing data available on more than 50 patients, including Abida (1), Broad/Cornell (3,7), Kumar (3,8), PCF/SU2C (2), and GENIE (6).

## References:

1. Abida W, Armenia J, Gopalan A, Brennan R, Walsh M, Barron D, *et al.* Prospective Genomic Profiling of Prostate Cancer Across Disease States Reveals Germline and Somatic Alterations That May Affect Clinical Decision Making. *JCO Precis Oncol* **2017**;2017 doi 10.1200/PO.17.00029.
2. Robinson D, Van Allen EM, Wu YM, Schultz N, Lonigro RJ, Mosquera JM, *et al.* Integrative clinical genomics of advanced prostate cancer. *Cell* **2015**;161(5):1215-28 doi 10.1016/j.cell.2015.05.001.
3. Armenia J, Wankowicz SAM, Liu D, Gao J, Kundra R, Reznik E, *et al.* The long tail of oncogenic drivers in prostate cancer. *Nat Genet* **2018**;50(5):645-51 doi 10.1038/s41588-018-0078-z.
4. Taylor BS, Schultz N, Hieronymus H, Gopalan A, Xiao Y, Carver BS, *et al.* Integrative genomic profiling of human prostate cancer. *Cancer Cell* **2010**;18(1):11-22 doi 10.1016/j.ccr.2010.05.026.
5. Cancer Genome Atlas Research N. The Molecular Taxonomy of Primary Prostate Cancer. *Cell* **2015**;163(4):1011-25 doi 10.1016/j.cell.2015.10.025.
6. Consortium APG. AACR Project GENIE: Powering Precision Medicine through an International Consortium. *Cancer Discov* **2017**;7(8):818-31 doi 10.1158/2159-8290.CD-17-0151.
7. Barbieri CE, Baca SC, Lawrence MS, Demichelis F, Blattner M, Theurillat JP, *et al.* Exome sequencing identifies recurrent SPOP, FOXA1 and MED12 mutations in prostate cancer. *Nat Genet* **2012**;44(6):685-9 doi 10.1038/ng.2279.
8. Kumar A, Coleman I, Morrissey C, Zhang X, True LD, Gulati R, *et al.* Substantial interindividual and limited intraindividual genomic diversity among tumors from men with metastatic prostate cancer. *Nat Med* **2016**;22(4):369-78 doi 10.1038/nm.4053.
